# Supplementary material for: Is the Selfish Never Selfless? Experimental Evidence from Charitable Giving Dictator Game Played by Pre-Service Teachers in Cambodia
Source: Preprints.org preprint supplement (doi:10.20944/preprints202409.2115.v1), 2024-09-27
Supplement: Supplementary file 1 [file supplementary]

### Supplemental Information (SI)

Is the selfish never selfless? Experimental evidence from charitable giving dictator game  
played by pre-service teachers in Cambodia.

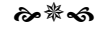

*Table 1: Descriptive statistics for the baseline characteristics.*

| No | Variables                                                        | Full sample<br>(n=350) |      | Control group<br>(n=88) |      | Testing 1<br>(n=143) |      | Testing 2<br>(n=119) |      |
|----|------------------------------------------------------------------|------------------------|------|-------------------------|------|----------------------|------|----------------------|------|
|    |                                                                  | Mean                   | SD   | Mean                    | SD   | Mean                 | SD   | Mean                 | SD   |
| 1  | Female (1=female; 0=otherwise)                                   | 0.72                   | 0.45 | 0.73                    | 0.45 | 0.71                 | 0.46 | 0.74                 | 0.44 |
| 2  | Age (in years)                                                   | 21.88                  | 2.09 | 21.93                   | 1.94 | 22.07                | 2.24 | 21.61                | 1.98 |
| 3  | Single (1=single; 0=otherwise)                                   | 0.95                   | 0.21 | 0.97                    | 0.18 | 0.93                 | 0.26 | 0.97                 | 0.16 |
| 4  | Teaching level dummy (1=primary level; 0=secondary level)        | 0.60                   | 0.49 | 0.58                    | 0.50 | 0.64                 | 0.48 | 0.56                 | 0.50 |
| 5  | Part-time job dummy (1=yes; 0=otherwise)                         | 0.10                   | 0.30 | 0.13                    | 0.33 | 0.11                 | 0.32 | 0.08                 | 0.27 |
| 6  | Religion dummy (1=Buddhism; 0=otherwise)                         | 0.97                   | 0.16 | 0.95                    | 0.21 | 0.94                 | 0.12 | 0.97                 | 0.16 |
| 7  | Experience in Environmental volunteering (1=yes;<br>0=otherwise) | 0.35                   | 0.48 | 0.38                    | 0.49 | 0.33                 | 0.47 | 0.36                 | 0.48 |
| 8  | Experience in blood donation (1=yes; 0=otherwise)                | 0.13                   | 0.34 | 0.16                    | 0.37 | 0.13                 | 0.33 | 0.11                 | 0.31 |
| 9  | Experience in money donation (1=yes; 0=otherwise)                | 0.79                   | 0.40 | 0.78                    | 0.41 | 0.76                 | 0.43 | 0.85                 | 0.36 |
| 10 | Voting intention (1=Most unlikely; 5=Most likely)                | 4.70                   | 0.91 | 4.81                    | 0.69 | 4.68                 | 0.91 | 4.66                 | 1.05 |
| 11 | National pride (0=Not at all; 10=Extremely proud)                | 9.41                   | 1.03 | 9.42                    | 1.00 | 9.39                 | 1.09 | 9.43                 | 0.96 |
| 12 | Trip to enjoy nature (0=never; 3=often)                          | 1.48                   | 0.76 | 1.55                    | 0.77 | 1.40                 | 0.72 | 1.53                 | 0.79 |

### Stimulus Material

The video of Children's Fund (CCF):

<https://www.facebook.com/cambodianchildrensfund/videos/256347602538471>

The Video of Wildlife Alliance (WA):

<https://www.facebook.com/WildlifeAlliance/videos/731824067427549>

*Table 2: Factor loading after varimax rotation of the construct's empathy.*

|                                                                                                                        | One-Factor |
|------------------------------------------------------------------------------------------------------------------------|------------|
| Item 1: I get involved with the feelings of the suffering persons/animals                                              | 0.85       |
| Item 2: I feel as though I were one of the suffering persons/animals                                                   | 0.67       |
| Item 3: I have tender, concerned feelings for the suffering persons/animals                                            | 0.77       |
| Item 4: I feel what the suffering persons/animals are feeling                                                          | 0.76       |
| Item 5: I feel the pain the suffering persons/animal are experiencing                                                  | 0.78       |
| Item 6: I feel sympathetic toward the suffering persons/animals                                                        | 0.84       |
| Item 7: I imagine how I would feel if I were the suffering person/animals                                              | 0.66       |
| Item 8: I can very easily put myself in the place of the suffering persons/animals                                     | 0.75       |
| Item 9: I try to understand how the suffering persons/animals feel by imagining how things look from their perspective | 0.74       |
| Item 10: I visualize in my mind clearly and vividly how the suffering persons/animals feel in their situation          | 0.82       |
| Item 11: I feel protective toward the suffering persons/animals                                                        | 0.77       |
| Item 12: I try to put myself in the shoes of the suffering person/animals (dropped)                                    | -          |
| Eigen value ( $\lambda$ )                                                                                              | 6.46       |
| Internal Consistency (Cronbach's Alpha [ $\alpha$ ])                                                                   | 0.929      |
| Average empathy (M)                                                                                                    | 5.68       |

Table 3: Differences in emotions aroused by videos.

| Variables          | Control vs. Testing 1 |       |           | Control vs. Testing 2 |       |           | Testing 1 vs. Testing 2 |       |           |
|--------------------|-----------------------|-------|-----------|-----------------------|-------|-----------|-------------------------|-------|-----------|
|                    | Diff                  | S. E  | t value   | Diff                  | S. E  | t value   | Diff                    | S. E  | t value   |
| Empathy            | -0.976                | 0.126 | -7.732*** | -0.773                | 0.146 | -5.290*** | 0.203                   | 0.080 | 2.514*    |
| Empathic Anger     | 0.472                 | 0.234 | 2.013*    | -0.216                | 0.247 | -0.873    | -0.688                  | 0.220 | -3.123**  |
| Empathic Happiness | 0.008                 | 0.281 | 0.031     | -1.371                | 0.283 | -4.844*** | -1.380                  | 0.266 | -5.184*** |

Note: \*\*\*significance at the 0.1% level, \*\*significance at the 1% level, \*significance at the 5% level.

Table 4: Factor loading after varimax rotation.

|                                                                    | Two-Factor<br>Self-Enhancement |       |
|--------------------------------------------------------------------|--------------------------------|-------|
|                                                                    | [1]                            | [2]   |
| Item 1: It is important to me to have control over others' actions | 0.596                          | -     |
| Item 2: It is important to me to have authority over others        | 0.798                          | -     |
| Item 3: It is important to me to be influential                    | 0.822                          | -     |
| Item 4: It is important to me to have money and possessions        | 0.578                          | -     |
| Item 5: It is important to me to work hard and be ambitious        | 0.578                          | -     |
| Item 6: It is important to me to have fun                          | -                              | 0.803 |
| Item 7: It is important to me to enjoy the life's pleasures        | -                              | 0.812 |
| Item 8: It is important to me to do things I enjoys                | -                              | 0.748 |
| Eigen value ( $\lambda$ )                                          | 2.681                          | 1.667 |
| Explained variance                                                 | 2.348                          | 2.000 |
| Internal Consistency (Cronbach's Alpha [ $\infty$ ])               | 0.732                          | 0.693 |
| Average importance (M)                                             | 3.436                          | 5.306 |

Note: [1] = *Egoism*, [2] = *Hedonism*

Table 5: Results for the one-factor CFA Model.

|                                                                     | Unstandardized<br>value | Standardized<br>value |
|---------------------------------------------------------------------|-------------------------|-----------------------|
| Loading Self-enhancement                                            |                         |                       |
| <b>1.1 Egoism</b>                                                   |                         |                       |
| Value 1: It is important to me to have control over others' actions | 0.89***                 | 0.42***               |
| Value 2: It is important to me to have authority over others        | 1.17***                 | 0.62***               |
| Value 3: It is important to me to be influential                    | 1.77***                 | 0.83***               |
| Value 4: It is important to me to have money and possessions        | 0.98***                 | 0.49***               |
| Value 5: It is important to me to work hard and be ambitious        | 1.00 (fixed)            | 0.51***               |
| <b>1.2 Hedonism</b>                                                 |                         |                       |
| Value 6: It is important to me to have fun                          | 0.16*                   | 0.15*                 |
| Value 7: It is important to me to enjoy the life's pleasures        | 0.18 <sup>+</sup>       | 0.14 <sup>+</sup>     |
| Value 8: It is important to me to do things I enjoys                | 0.17*                   | 0.17*                 |
| <b>Variances</b>                                                    |                         |                       |
| error. Value 1                                                      | 1.94                    | 0.82                  |
| error. Value 2                                                      | 1.15                    | 0.61                  |
| error. Value 3                                                      | 0.75                    | 0.31                  |
| error. Value 4                                                      | 1.61                    | 0.76                  |
| error. Value 5                                                      | 1.49                    | 0.74                  |
| error. Value 6                                                      | 0.55                    | 0.98                  |
| error. Value 7                                                      | 0.82                    | 0.98                  |
| error. Value 8                                                      | 0.53                    | 0.97                  |
| Self-enhancement                                                    | 0.54                    | 1.00 (fixed)          |
| <b>Covariance</b>                                                   |                         |                       |
| error. value 6 with error. value 7                                  | 0.33***                 | 0.48***               |
| error. value 6 with error. value 8                                  | 0.21***                 | 0.39***               |
| error. value 7 with error. value 8                                  | 0.27***                 | 0.41***               |
| error. value 7 with error. value 1                                  | 0.18**                  | 0.14**                |
| error. value 1 with error. value 2                                  | 0.36**                  | 0.24***               |

Note: <sup>+</sup>  $p < 0.10$ , \*  $p < 0.05$ , \*\*  $p < 0.01$ , \*\*\*  $p < 0.001$ .

Table 6: Characteristics of the respondents and baseline comparisons by group.

| Variables                        | Testing Group                                 |       |                                                |       | Video on lecture<br>(Control group) |       | <i>F</i> -Test |
|----------------------------------|-----------------------------------------------|-------|------------------------------------------------|-------|-------------------------------------|-------|----------------|
|                                  | Video for humanitarian<br>charity (Testing 1) |       | Video for environmental<br>charity (Testing 2) |       |                                     |       |                |
|                                  | Mean                                          | SD    | Mean                                           | SD    | Mean                                | SD    |                |
| Demographic variables            |                                               |       |                                                |       |                                     |       |                |
| Female                           | 0.706                                         | 0.457 | 0.739                                          | 0.440 | 0.727                               | 0.447 | 0.18 (0.832)   |
| Age (in years)                   | 22.069                                        | 2.241 | 21.605                                         | 1.979 | 21.931                              | 1.940 | 1.66 (0.191)   |
| Single                           | 0.930                                         | 0.255 | 0.974                                          | 0.157 | 0.965                               | 0.182 | 1.67 (0.189)   |
| Teaching level dummy             | 0.643                                         | 0.480 | 0.563                                          | 0.498 | 0.579                               | 0.496 | 0.97 (0.379)   |
| Part-time job dummy              | 0.111                                         | 0.316 | 0.075                                          | 0.265 | 0.125                               | 0.332 | 0.77 (0.463)   |
| Religion                         | 1.020                                         | 0.186 | 1.033                                          | 0.222 | 1.056                               | 0.277 | 0.69 (0.500)   |
| Environmental volunteering dummy | 0.328                                         | 0.471 | 0.361                                          | 0.482 | 0.375                               | 0.486 | 0.29 (0.745)   |
| Blood donation dummy             | 0.125                                         | 0.332 | 0.109                                          | 0.313 | 0.159                               | 0.367 | 0.57 (0.568)   |
| Money donation dummy             | 0.755                                         | 0.431 | 0.848                                          | 0.359 | 0.784                               | 0.413 | 1.78 (0.170)   |
| Voting intention                 | 4.678                                         | 0.908 | 4.655                                          | 1.045 | 4.806                               | 0.692 | 0.79 (0.456)   |
| National pride                   | 9.391                                         | 1.094 | 9.428                                          | 0.961 | 9.420                               | 1.002 | 0.05 (0.954)   |
| Trip to enjoy natures            | 1.398                                         | 0.723 | 1.529                                          | 0.790 | 1.545                               | 0.771 | 1.40 (0.247)   |
| Egoistic values                  | 3.490                                         | 1.062 | 3.369                                          | 0.994 | 3.425                               | 1.046 | 0.44 (0.643)   |

Table 7: Correlation analysis of relevant variables.

| Variables               | Testing 1 (n=143)     |               |                          |                   |                 |                   |
|-------------------------|-----------------------|---------------|--------------------------|-------------------|-----------------|-------------------|
|                         | 1. Amount of donation | 2. Empathy    | 3. High-egoistic values  | 4. Empathic anger | 5. Empathic joy |                   |
| 1. Amount of donation   | -                     | 0.099         | 0.072                    | 0.111             | -0.026          | Testing 2 (n=119) |
| 2. Empathy              | 0.169**               | -             | <b>0.158<sup>+</sup></b> | 0.051             | 0.111           |                   |
| 3. High-egoistic values | -0.221***             | <b>-0.017</b> | -                        | -0.014            | -0.019          |                   |
| 4. Empathic anger       | 0.167**               | 0.131         | 0.084                    | -                 | -0.121          |                   |
| 5. Empathic joy         | 0.178                 | 0.205**       | 0.200**                  | 0.068             | -               |                   |

Note: \*\*\* significant at 0.1% level, \*\*significance at 1% level, \*significance at 5% level, +significance at 10% level.

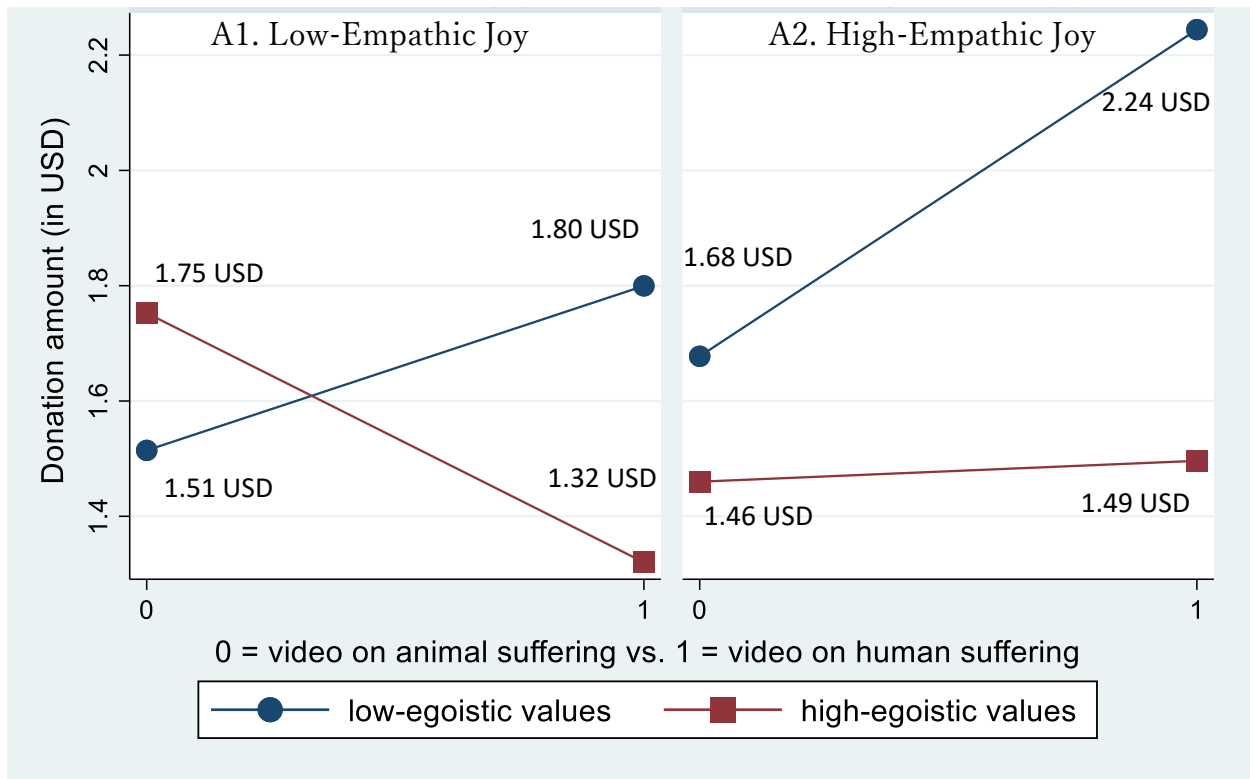

Figure A: Interaction effects of empathic joy on donations between Testing 1 and Testing 2

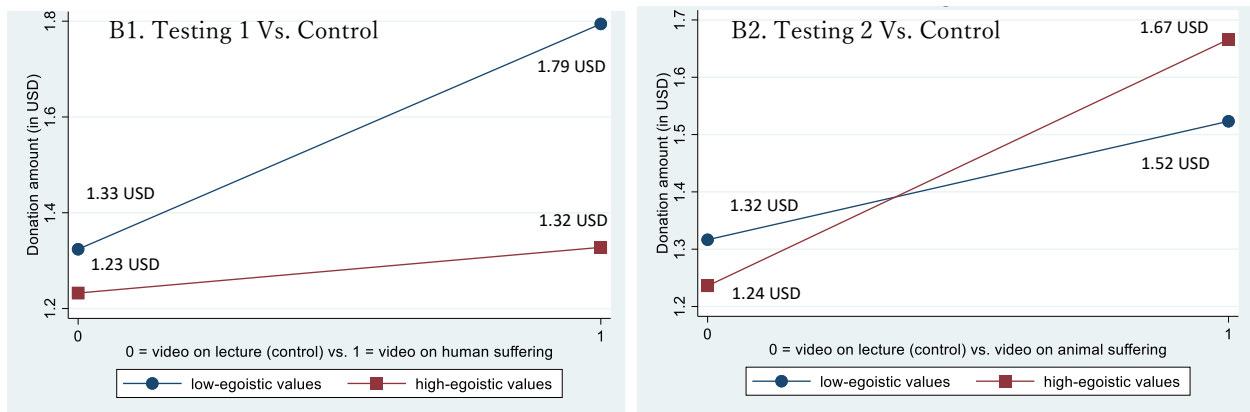

Figure B: Interaction effects of egoistic values on donation between Testing and Control

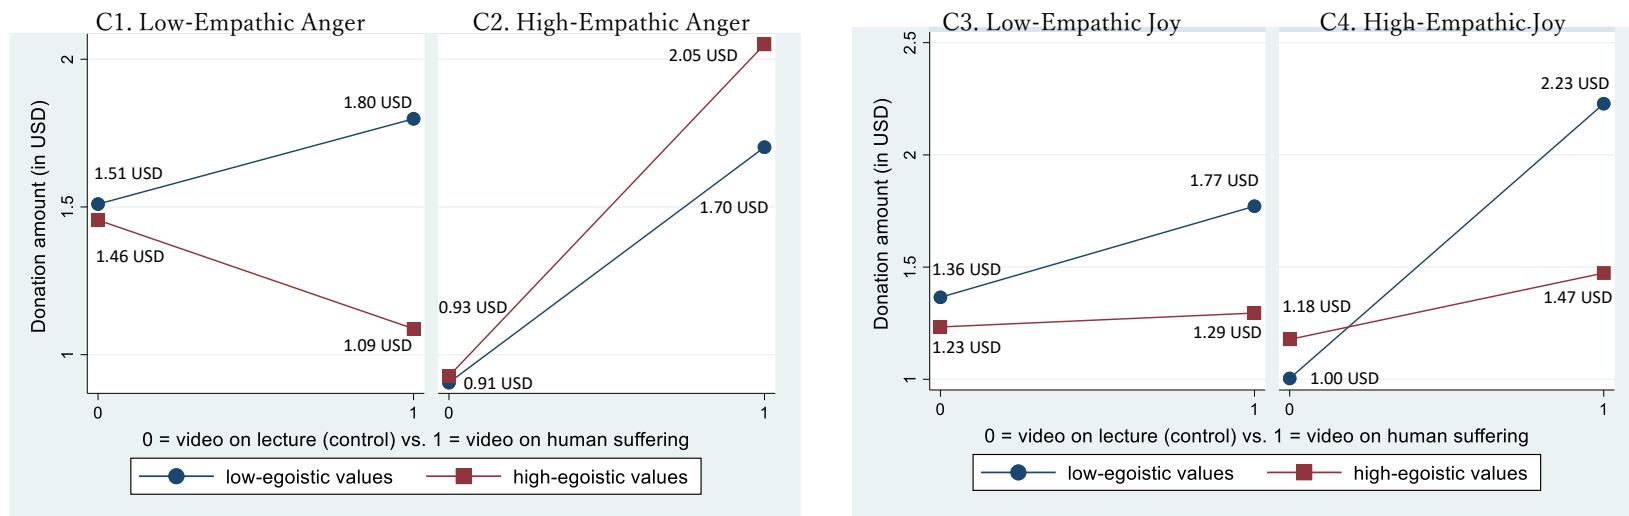

Figure C: Interaction effects of empathic anger and joy on donation between Testing 1 and Control

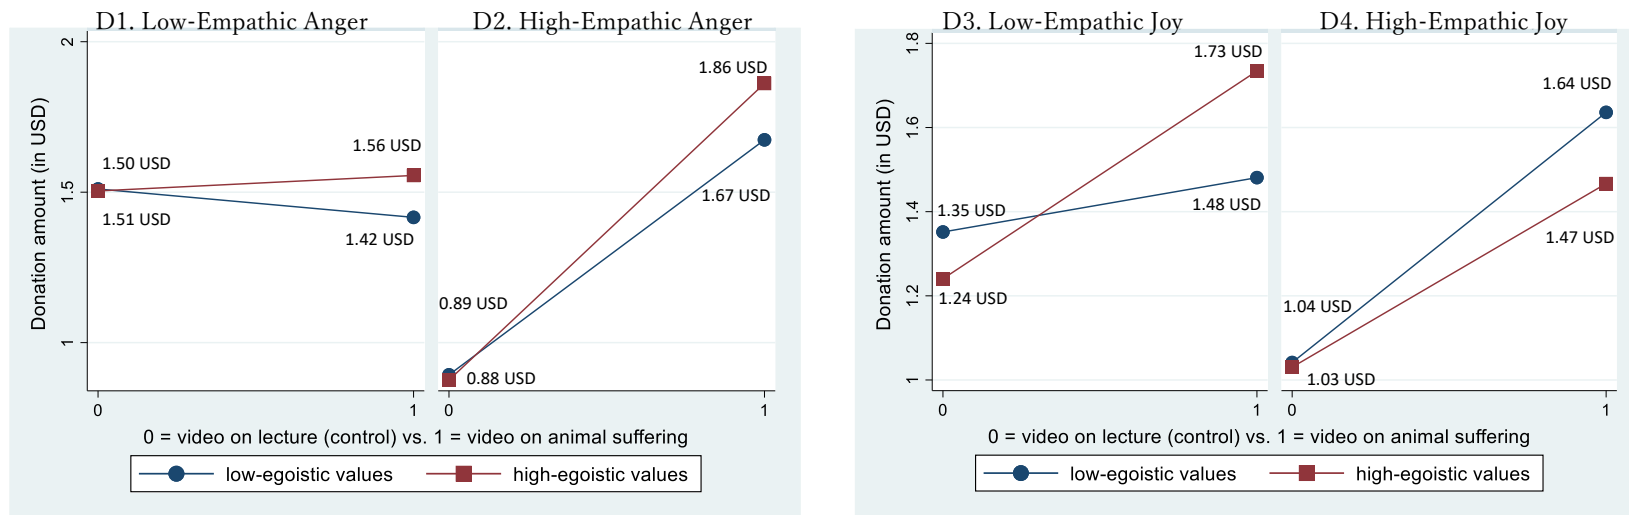

Figure D: Interaction effects of empathic anger and joy on donation between Testing 2 and Control



## Appendix 1: Guidance of the Charitable Giving Dictator Game for Research Participants

### INSTRUCTIONS:

You will be paid **\$2.5** for participating in this study, and you may receive additional money based upon the decisions you make. The **\$2.5** will be paid to you today after the study is completed. Additional money to be paid to you will be placed in an envelope and paid to you today, just after the completion of the study. The money comes from a research grant. The session took approximately 45 minutes. Participation is voluntary, and individuals may leave or sit quietly in their seat if they decide not to participate. You may quit participating at any point during this session.

There is an exercise asking you to make decisions about money. We request that you not discuss your decisions with others who are participating in this session of this study. We are very grateful for your willingness to participate in our study, and we thank you in advance. Please do not talk during the study. If you have a question, raise your hand, and I will come and answer it.

In this exercise, you have \$2.5 (this is in addition to your \$2.5 participation payment). You will be asked how much, if any, of this \$2.5 you will send to a real charity which you can choose below. If you choose, you may donate some, none, or all of this to one of the charities listed below. The researchers will send the money to the charity you have chosen.

The **Wildlife Alliance Cambodia** (អង្គការសម្ព័ន្ធមិត្តសត្វព្រៃ)<sup>1</sup>: The Wildlife Alliance is the leader in direct protection of forests and wildlife in the Southeast Asian tropical belt. We targeted the forests of the tropical belt because of their importance in regulating the global climate. Southeast Asia has the fastest rate of deforestation of all three of the world's tropical basins, requiring the most urgent intervention. Our model provides **direct ranger intervention** to stop destruction.

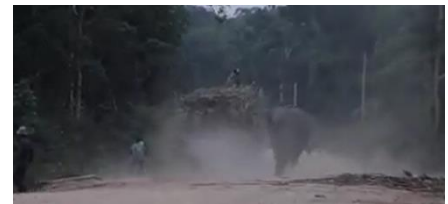

Source: <https://www.wildlifealliance.org/>

---

<sup>1</sup> Wildlife Alliance Cambodia mission is to protect forests and wildlife in the Southeast Asian tropical belt.

**Cambodian Children's Fund** (មូលនិធិកុមារកម្ពុជា)<sup>2</sup>: The CCF team works on the ground in Cambodia to offer support to people in need. Our head office and executive team are situated in the community and work together with the project delivery staff. CCF works in direct contact with the most at-risk students, their families and wider community members to create a highly responsive approach to addressing the daily issues faced by those living in extreme poverty.

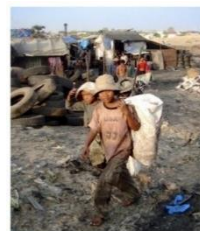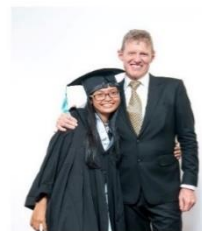

Source: <https://www.cambodianchildrensfund.org/>

1. Please first **check just one** ✓ charity below for any possible donation (check your preferred charity even if you choose not to donate):

\_\_\_\_\_ **Wildlife Alliance Cambodia** (អង្គការសម្ព័ន្ធមិត្តសត្វព្រៃ)

\_\_\_\_\_ **Cambodian Children's Fund** (មូលនិធិកុមារកម្ពុជា)

2. Please check **just one** ✓ of the lines below, indicating how much you want to send to the charity:

| (1)                           | (2)                     |
|-------------------------------|-------------------------|
| Amount you send to<br>Charity | Amount you keep         |
| _____ 00.00\$ (\$0.00)        | _____ 10,000\$ (\$2.50) |
| _____ 1,000\$ (\$0.25)        | _____ 9,000\$ (\$2.25)  |
| _____ 2,000\$ (\$0.50)        | _____ 8,000\$ (\$2.00)  |
| _____ 3,000\$ (\$0.75)        | _____ 7,000\$ (\$1.75)  |
| _____ 4,000\$ (\$1.00)        | _____ 6,000\$ (\$1.50)  |
| _____ 5,000\$ (\$1.25)        | _____ 5,000\$ (\$1.25)  |
| _____ 6,000\$ (\$1.50)        | _____ 4,000\$ (\$1.00)  |
| _____ 7,000\$ (\$1.75)        | _____ 3,000\$ (\$0.75)  |
| _____ 8,000\$ (\$2.00)        | _____ 2,000\$ (\$0.50)  |
| _____ 9,000\$ (\$2.25)        | _____ 1,000\$ (\$0.25)  |
| _____ 10,000\$ (\$2.50)       | _____ 00.00\$ (\$0.00)  |

<sup>2</sup> Cambodia's Children Fund mission is to transform the most impoverished children into tomorrow's leaders.
